# Special Offer for APA Members

\$84 APA Member Subscription to *Psychiatric Services*

25% off the nonmember price!

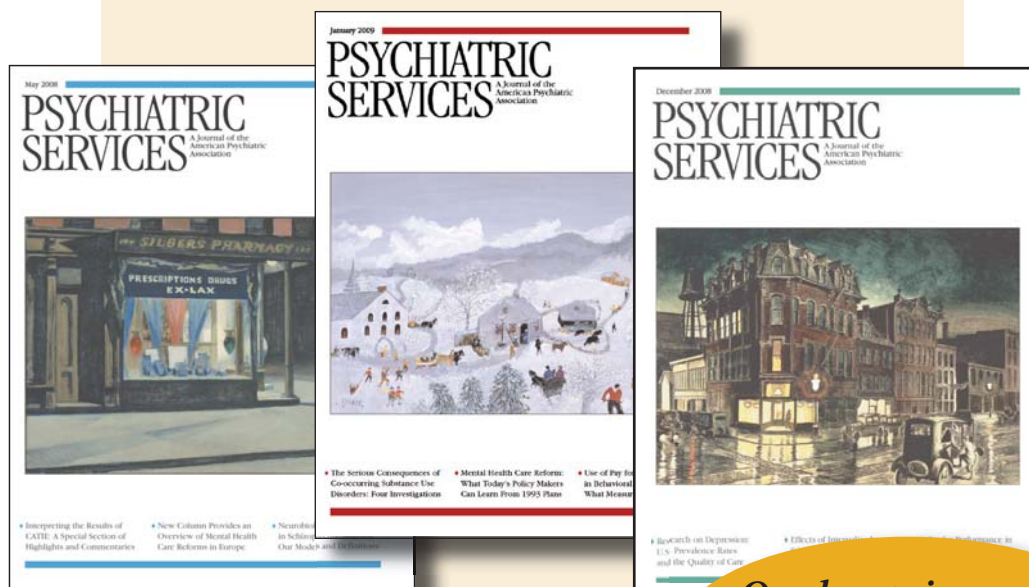

One low price covers  
your print and online  
subscription

Starting with the July 2009 issue,  
APA members will no longer receive  
*Psychiatric Services* as a free member benefit.

Each issue covers an array of topics, with a focus on people with serious mental illness:

- Evidence-based and best practices: delivering effective services and programs
- Recovery-oriented, client-centered care: how systems are being transformed
- Racial-ethnic disparities in care: how they arise and how to overcome them
- Criminal justice involvement and homelessness: diversion and housing programs
- Use of medications: improving adherence, monitoring trends and treatment adequacy
- Medicaid changes and recent court cases: what they mean for your practice

For more information or to subscribe,  
call Customer Service at 1-800-368-5777  
or visit [www.appi.org](http://www.appi.org)

Order today and make sure that you don't miss an issue!\*

\*If you currently receive *Psychiatric Services* as a free member benefit, your order for a year's subscription will be processed to begin with the July 2009 issue.

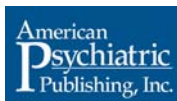

The First and Last Word in Psychiatry

Order Online: [www.appi.org](http://www.appi.org) • Toll Free: 1-800-368-5777 • Fax: 703-907-1091 • Email: [appi@psych.org](mailto:appi@psych.org)  
Priority Code AH901

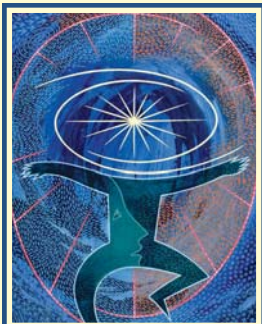

This program will be conducted on May 18, 2009, during the APA 2009 Annual Meeting

## AUGMENTATION STRATEGIES FOR MAJOR DEPRESSIVE DISORDER:

THE EVIDENCE FOR EFFECTIVE CLINICAL DECISION-MAKING IN IMPROVING PATIENT CARE

MONDAY, MAY 18, 2009 | Breakfast: 6:30–7:00 AM | Symposium: 7:00–9:00 AM  
Hilton San Francisco Hotel | Grand Ballroom, Salon B | **SAN FRANCISCO, CALIFORNIA**

### AGENDA

- 6:30–7:00 AM Breakfast
- 7:00–7:05 AM Introduction & Overview  
**MADHUKAR H. TRIVEDI, MD (Chairperson)**  
University of Texas Southwestern Medical Center
- 7:05–7:30 AM Inadequate Treatment Response in Major Depressive Disorder: Predictors and Strategies for Selecting Next-Step Treatments  
**ROY H. PERLIS, MD, MSc**  
Harvard Medical School
- 7:30–7:55 AM Effective Management of Treatment-Resistant Depression: Evidence-Based Approaches Beyond First-Line Antidepressant Monotherapy  
**MADHUKAR H. TRIVEDI, MD**
- 7:55–8:20 AM Atypical Antipsychotics as Augmentation Agents for Major Depressive Disorder: Efficacy and Tolerability  
**GEORGE I. PAPAPOSTAS, MD**  
Harvard Medical School
- 8:20–9:00 AM Panel Discussion/Question and Answer Session  
**ALL FACULTY**

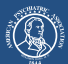

Sponsored by the  
American Psychiatric Association

Supported by an  
educational grant from

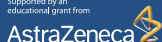

### EDUCATIONAL ACTIVITY LEARNING OBJECTIVES

At the conclusion of this symposium, the participant should be able to:

- Discuss and interpret the clinical implications of factors underlying inadequate response to antidepressant therapy in patients with MDD
- Compare and contrast the rationale for using different second-line strategies in patients who do not respond adequately to antidepressants
- Evaluate the clinical trial evidence for the use of atypical antipsychotics in the management of MDD

### CME STATEMENT

This symposium will be conducted on May 18, 2009, during the APA 2009 Annual Meeting. The American Psychiatric Association (APA) is accredited by the Accreditation Council for Continuing Medical Education to provide continuing medical education for physicians. The APA designates this educational activity for a maximum of 2 *AMA PRA Category 1 Credits*™. Physicians should only claim credit commensurate with the extent of their participation in the activity. Attendees must be registered for the APA Annual Meeting to attend this symposium. Seating is limited and will be based on first-come, first-served. For more information about the meeting, please visit the APA Web site at [www.psych.org](http://www.psych.org) or contact the APA toll free at 1-888-357-7924 (within the US or Canada) or 703-907-7300.

If any participant of this activity given by The France Foundation is in need of accommodation, please fax written requests to 1-860-434-5390.

## Credible research

about the most appropriate use for prescription medications *without pharmaceutical industry influence* is now just a click away.

Prescribing for Better Outcomes — a program of The University of North Carolina at Chapel Hill — provides physicians with accurate information about the uses of anti-epileptic drugs in the treatment of bipolar disorder.

[www.PrescribingforBetterOutcomes.org](http://www.PrescribingforBetterOutcomes.org)

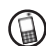

Text "RX" to 54608 to learn more about this program.

**PRESCRIBING for BETTER OUTCOMES**



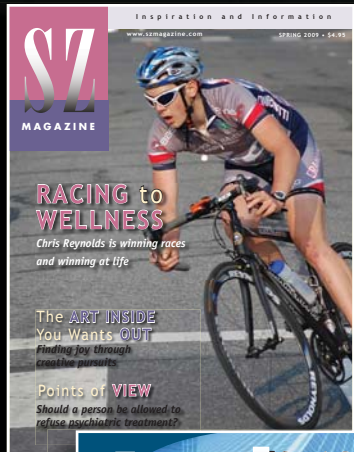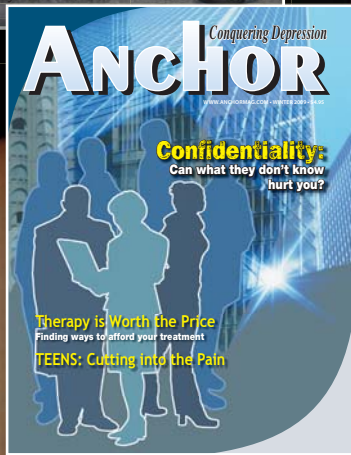

*Help us...  
Help you*

**SZ Magazine and ANCHOR: Conquering Depression** provide information your patients and their caregivers can access—encouraging discussion of their options...

**FOR HEALTHIER AND HAPPIER LIVES.**

**Subscribe to SZ Magazine  
and Anchor Magazine today!**

PHONE: 1-866-672-3038 • FAX: 905-994-0304

VISIT: [www.magpiemags.com](http://www.magpiemags.com)

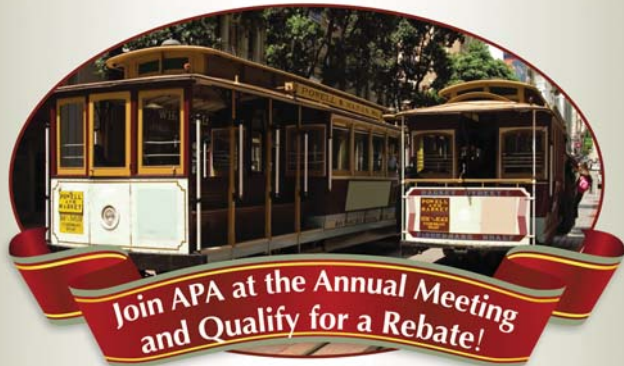

**You May Qualify If You:**

1. Are a psychiatrist residing in the U.S. or Canada and,
2. Have paid the full-time registration fee for the Annual Meeting (\$850.00/advance, \$940.00/on-site).

**To Apply:**

1. Stop by the APA Member Center to fill out an APA Membership Application on-site during the meeting.
2. Provide proof of ACGME-AOA or RCPS(C)—approved psychiatry residency training and a current, valid medical license to APA no later than June 30, 2009.

**How the Rebate Works:**

1. Your local psychiatric District Branch must approve the application no later than September 30, 2009.
2. The difference between the member and non-member Annual Meeting registration fee will be applied towards your pro-rated 2009 national and local dues.

Please stop by the APA Member Center at the Annual Meeting to learn more about the many benefits of APA membership.

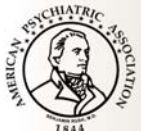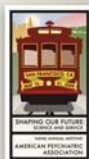

**AMERICAN PSYCHIATRIC ASSOCIATION**

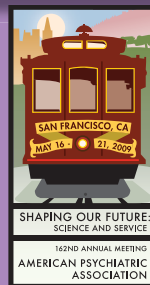

**Register Now!**

*Save the Date!*

**American Psychiatric Association  
162nd Annual Meeting  
May 16-21, 2009  
Moscone Center • San Francisco, CA**

**Join us for the premier scientific meeting of the year in the grand city of San Francisco, CA**

- Earn Up to 66 hours of AMA PRA Category 1 Credits™.
- World-renowned lecturers including Irvin Yalom M.D. and Dean Ornish M.D.
- State-of-the-art clinical practice updates and cutting-edge science.
- The ever popular *Advances In* series expanded.
- Frontiers in Science, Distinguished Psychiatrists, and Presidential Symposia.
- Order access (online and/or DVD-ROM) to the 2009 Annual Meeting Online highlights at special attendee prices.

San Francisco Convention & Visitors Bureau photo.

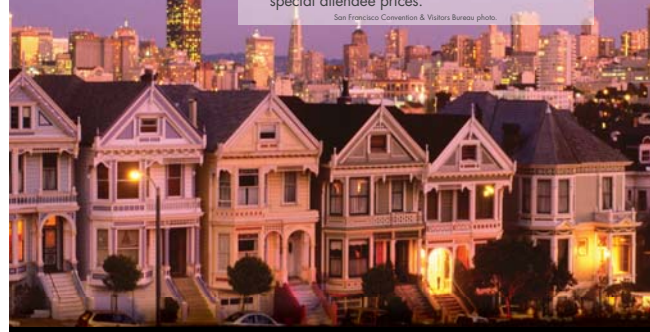

**Register online at: [www.psych.org](http://www.psych.org)**



# SEE ME FOR WHO I CAN BE

GREG, 35\*

Diner Worker

Diagnosis: Schizophrenia

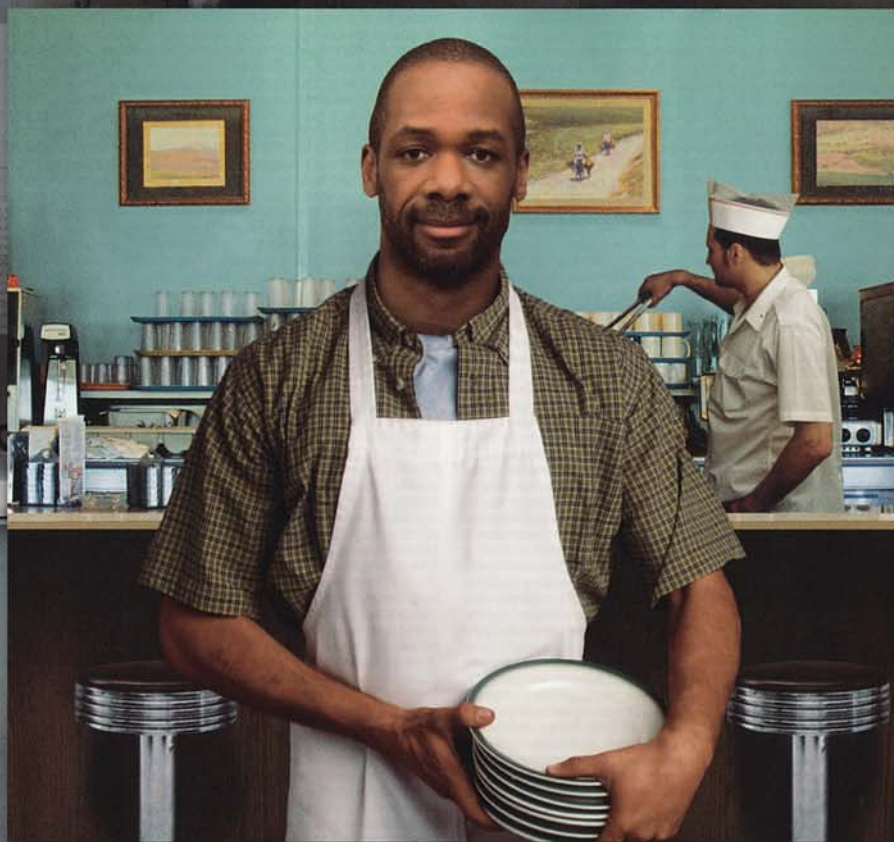

\*Not an actual patient.

## Do you see your patients' full potential?

GEODON is indicated for the treatment of schizophrenia.

Elderly patients with dementia-related psychosis treated with antipsychotic drugs are at an increased risk of death compared to placebo. GEODON is not approved for the treatment of patients with dementia-related psychosis.

GEODON is contraindicated in patients with a known history of QT prolongation, recent acute myocardial infarction, or uncompensated heart failure, and should not be used with certain other QT-prolonging drugs. GEODON has a greater capacity to prolong the QT<sub>c</sub> interval than several antipsychotics. In some drugs, QT prolongation has been associated with torsade de pointes, a potentially fatal arrhythmia. In many cases this would lead to the conclusion that other drugs should be tried first. Hypokalemia may increase the risk of QT prolongation and arrhythmia.

As with all antipsychotic medications, a rare and potentially fatal condition known as neuroleptic malignant syndrome (NMS) has been reported with GEODON. NMS can cause hyperpyrexia, muscle rigidity, diaphoresis, tachycardia, irregular pulse or blood pressure, cardiac dysrhythmia, and altered mental status. If signs and symptoms appear, immediate discontinuation, treatment, and monitoring are recommended.

Prescribing should be consistent with the need to minimize tardive dyskinesia (TD), a potentially irreversible dose- and duration-dependent syndrome. If signs and symptoms appear, discontinuation should be considered since TD may remit partially or completely.

Hyperglycemia-related adverse events, sometimes serious, have been reported in patients treated with atypical antipsychotics. There have been few reports of hyperglycemia or diabetes in patients treated with GEODON, and it is not known if GEODON is associated with these events. Patients treated with an atypical antipsychotic should be monitored for symptoms of hyperglycemia.

Precautions include the risk of rash, orthostatic hypotension, and seizures.

In short-term schizophrenia trials, the most commonly observed adverse events associated with GEODON at an incidence of  $\geq 5\%$  and at least twice the rate of placebo were somnolence and respiratory tract infection.

Please see brief summary of prescribing information on adjacent page.

For more information, please visit [www.pfizerpro.com/GEODON](http://www.pfizerpro.com/GEODON)

**GEODON**<sup>®</sup>  
(ziprasidone HCl) Capsules



**BRIEF SUMMARY.** See package insert for full prescribing information.

**Increased Mortality in Elderly Patients with Dementia-Related Psychosis**—Elderly patients with dementia-related psychosis treated with antipsychotic drugs are at an increased risk of death. Analyses of seventeen placebo-controlled trials (modal duration of 10 weeks), largely in patients taking atypical antipsychotic drugs, revealed a sevenfold increase in risk of death in treated patients of between 1.6 to 1.7 times the risk of death in placebo-treated patients. Over the course of a typical 10-week controlled trial, the rate of death in drug-treated patients was about 4.3%, compared to a rate of about 2.6% in the placebo group. Although the causes of death were varied, most of the deaths appeared to be either cardiovascular (e.g., heart failure, sudden death) or infectious (e.g., pneumonia) in nature. Observational studies suggest that, similar to atypical antipsychotic drugs, treatment with conventional antipsychotic drugs may increase mortality. The extent to which the findings of increased mortality in observational studies may be attributed to the antipsychotic drug as opposed to some characteristic(s) of the patients is not clear. GEODON (ziprasidone) is not approved for the treatment of patients with Dementia-Related Psychosis (see WARNINGS).

**INDICATIONS**—GEODON Capsules is indicated for the treatment of schizophrenia and acute manic or mixed episodes associated with bipolar disorder with or without psychotic features. GEODON<sup>®</sup> (ziprasidone mesylate) for Injection is indicated for acute agitation in schizophrenic patients.

**CONTRAINDICATIONS**—**QT Prolongation:** Because of GEODON's dose-related prolongation of the QT interval and the known association of fatal arrhythmias with QT prolongation by some other drugs, GEODON is contraindicated in patients with a known history of QT prolongation (including congenital long QT syndrome), with recent acute myocardial infarction, or with uncompensated heart failure (see WARNINGS). Pharmacokinetic/pharmacodynamic studies between GEODON and other drugs that prolong the QT interval have not been performed. An additive effect of GEODON and other drugs that prolong the QT interval cannot be excluded. Therefore, GEODON should not be given with dofetilide, sotalol, quinidine, other Class Ia and III anti-arrhythmics, mesoridazine, thioridazine, chlorpromazine, droperidol, pimozide, sparfloxacin, tetracycline, moxifloxacin, halofantrine, mefloquine, pentamidine, arsenic trioxide, levomethadyl acetate, dolasetron mesylate, procabrol, or tacrolimus. GEODON is also contraindicated with drugs that have demonstrated QT prolongation as one of their pharmacodynamic effects and have this effect described in the full prescribing information as a contraindication or a boxed or bolded warning (see WARNINGS). GEODON is contraindicated in individuals with a known hypersensitivity to the product. **WARNINGS**—**Increased Mortality in Elderly Patients with Dementia-Related Psychosis.** Elderly patients with dementia-related psychosis treated with antipsychotic drugs are at an increased risk of death. GEODON (ziprasidone) is not approved for the treatment of patients with dementia-related psychosis (see BOXED WARNING). **QT Prolongation and Risk of Sudden Death:** GEODON use should be avoided in combination with other drugs that are known to prolong the QT interval. Additionally, clinicians should be alert to the identification of other drugs that have been consistently observed to prolong the QT interval. Such drugs should not be prescribed with GEODON. A study directly comparing the QT/QTc prolonging effect of GEODON with several other drugs effective in the treatment of schizophrenia was conducted in patient volunteers. The mean increase in QTc from baseline for GEODON ranged from approximately 9 to 14 msec greater than for four of the comparator drugs (risperidone, olanzapine, quetiapine, and haloperidol), but was approximately 14 msec less than the prolongation observed for thioridazine. In this study, the effect of GEODON on QTc length was not augmented by the presence of a metabolic inhibitor (ketoconazole 200 mg bid). In placebo-controlled trials, GEODON increased the QTc interval compared to placebo by approximately 10 msec at the highest recommended daily dose of 160 mg. In clinical trials the electrocardiograms of 2,298 (0.06%) GEODON patients and 1,440 (0.23%) placebo patients revealed QTc intervals exceeding the potentially clinically relevant threshold of 500 msec. In the GEODON patients, neither case suggested a role of GEODON. Some drugs that prolong the QT/QTc interval have been associated with the occurrence of torsades de pointes and with sudden unexplained death. The relationship of QT prolongation to torsades de pointes is clearest for larger increases (20 msec and greater) but it is possible that smaller QT/QTc prolongations may also increase risk, or increase it in susceptible individuals, such as those with hypokalemia, hypomagnesemia, or genetic predisposition. Although torsades de pointes has not been observed in association with the use of GEODON at recommended doses in premarketing studies, experience is too limited to rule out an increased risk. A study evaluating the QT/QTc prolonging effect of intramuscular GEODON, with intramuscular haloperidol as a control, was conducted in patient volunteers. In the trial, ECGs were obtained at the time of maximum plasma concentration following two injections of GEODON (20 mg then 30 mg) or haloperidol (7.5 mg then 10 mg) given four hours apart. Note that a 30 mg dose of intramuscular GEODON is 50% higher than the recommended therapeutic dose. The mean change in QTc from baseline was calculated for each drug using a sample-based correction that removes the effect of heart rate on the QT interval. The mean increase in QTc from baseline for GEODON was 4.6 msec following the first injection and 12.8 msec following the second injection. The mean increase in QTc from baseline for haloperidol was 6.0 msec following the first injection and 14.7 msec following the second injection. In this study, no patient had a QTc interval exceeding 500 msec. As with other antipsychotic drugs and placebo, sudden unexplained deaths have been reported in patients taking GEODON at recommended doses. The premarketing experience for GEODON did not reveal an excess of mortality for GEODON compared to other antipsychotic drugs or placebo, but the extent of exposure was limited, especially for the drugs used as active controls and placebo. Nevertheless, GEODON's larger prolongation of QTc length compared to several other antipsychotic drugs raises the possibility that the risk of sudden death may be greater for GEODON than for other available drugs for treating schizophrenia. This possibility needs to be considered in deciding among alternative drug products. Certain circumstances may increase the risk of the occurrence of torsades de pointes and/or sudden death in association with the use of drugs that prolong the QTc interval, including (1) bradycardia; (2) hypokalemia or hypomagnesemia; (3) concomitant use of other drugs that prolong the QTc interval; and (4) presence of congenital prolongation of the QT interval. GEODON should also be avoided in patients with congenital long QT syndrome and in patients with a history of cardiac arrhythmias (see CONTRAINDICATIONS, and see Drug Interactions under PRECAUTIONS). It is recommended that patients being considered for GEODON treatment who are at risk for significant electrolyte disturbances, hypokalemia in particular, have baseline serum potassium and magnesium measurements. Hypokalemia (and/or hypomagnesemia) may increase the risk of QT prolongation and arrhythmia. Hypokalemia may result from diuretic therapy, diarrhea, and other causes. Patients with low serum potassium and/or magnesium should be repleted with those electrolytes before proceeding with treatment. It is essential to periodically monitor serum electrolytes in patients for whom diuretic therapy is introduced during GEODON treatment. Persistently prolonged QTc intervals may also increase the risk of further prolongation and arrhythmia, but it is not clear that routine screening ECG measures are effective in detecting such patients. Rather, GEODON should be avoided in patients with histories of significant cardiovascular illness, e.g., QT prolongation, recent acute myocardial infarction, uncompensated heart failure, or cardiac arrhythmia. GEODON should be discontinued in patients who are found to have persistent QTc measurements >500 msec. **Neuroleptic Malignant Syndrome (NMS):** A potentially fatal symptom complex sometimes referred to as Neuroleptic Malignant Syndrome (NMS) has been reported in association with administration of antipsychotic drugs. The management of NMS should include: (1) immediate discontinuation of antipsychotic drugs and other drugs not essential to concurrent therapy; (2) intensive symptomatic treatment and medical monitoring; and (3) treatment of any concomitant serious medical problems for which specific treatments are available. If a patient requires antipsychotic drug treatment after recovery from NMS, the potential reintroduction of drug therapy should be carefully considered. The patient should be carefully monitored, since recurrences of NMS have been reported. **Tardive Dyskinesia (TD):** A syndrome of potentially irreversible, involuntary, dyskinetic movements may develop in patients being treated with antipsychotic drugs. Although the prevalence of TD appears to be highest among the elderly, especially elderly women, it is impossible to rely upon prevalence estimates to predict, at the inception of antipsychotic treatment, which patients are likely to develop TD. It signs and symptoms of TD appear in a patient on GEODON, drug discontinuation should be considered. **Hyperglycemia and Diabetes Mellitus:** Hyperglycemia-related adverse events, sometimes serious, have been reported in patients treated with atypical antipsychotics. There have been few reports of hyperglycemia or diabetes in patients treated with GEODON, and it is not known if GEODON is associated with these events. Patients treated with an atypical antipsychotic should be monitored for symptoms of hyperglycemia. **PRECAUTIONS**—**General:** Rash: In premarketing trials, about 5% of GEODON patients developed rash and/or urticaria, with discontinuation of treatment in about one-sixth of these cases. The occurrence of rash was dose related, although the finding might also be explained by longer exposure in higher-dose patients. Several patients with rash had signs and symptoms of associated systemic illness, e.g., elevated WBCs. Most patients improved promptly upon treatment with antihistamines or steroids and/or upon discontinuation of GEODON, and all patients were reported to recover completely. Upon appearance of rash for which an alternative etiology cannot be identified, GEODON should be discontinued. **Orthostatic Hypotension:** GEODON may induce orthostatic hypotension associated with dizziness, tachycardia, and, in some patients, syncope, especially during the initial dose-titration period, probably reflecting its  $\alpha_1$ -adrenergic antagonist properties. Syncope was reported in 0.6% of GEODON patients. GEODON should be used with particular caution in patients with known cardiovascular disease (history of myocardial infarction or ischemic heart disease, heart failure or conduction abnormalities), cerebrovascular disease or conditions that would predispose patients to hypotension (dehydration, hypovolemia, and treatment with antihypertensive medications). **Seizures:** In clinical trials, seizures occurred in 0.4% of GEODON patients. There were confounding factors that may have contributed to seizures in many of these cases. As with other antipsychotic drugs, GEODON should be used cautiously in patients with a history of seizures or with conditions that potentially lower the seizure threshold, e.g., Alzheimer's dementia. Conditions that lower the seizure threshold may be more prevalent in a population of 65 years or older. **Dysphagia:** Esophageal dysmotility and aspiration have been associated with antipsychotic drug use. Aspiration pneumonia is a common cause of morbidity and mortality in elderly patients, in particular those with advanced Alzheimer's dementia, and GEODON and other antipsychotic drugs should be used cautiously in patients at risk for aspiration pneumonia. (See also Boxed WARNING: Increased Mortality in Elderly Patients with Dementia-Related Psychosis) **Hyperlocomotion:** As with other drugs that antagonize dopamine D<sub>2</sub> receptors, GEODON elevates prolactin levels in humans. Tissue culture experiments indicate that approximately one third of human breast cancers are prolactin dependent in vitro, a factor of potential importance if the prescription of these drugs is contemplated in a patient with previously detected breast cancer. Neither clinical studies nor epidemiologic studies conducted to date have shown an association between chronic administration of this class of drugs and tumorogenesis in humans; the available evidence is considered too limited to be conclusive at this time. **Potential for Cognitive and Motor Impairment:** Somnolence was a commonly reported adverse event in GEODON patients. In the 4- and 6-week placebo-controlled trials, somnolence was reported in 14% of GEODON patients vs 7% of placebo patients. Somnolence led to discontinuation in 0.3% of patients in short-term clinical trials. Since GEODON has the potential to impair judgment, thinking, or motor skills, patients should be cautioned about performing activities requiring mental alertness, such as operating a motor vehicle (including automobiles) or operating hazardous machinery until they are reasonably certain that GEODON therapy does not affect them adversely. **Priapism:** One case of priapism was reported in the premarketing database. **Body Temperature Regulation:** Although not reported with GEODON in premarketing trials, disruption of the body's ability to reduce core body temperature has been attributed to antipsychotic agents. **Suicide:** The possibility of a suicide attempt is inherent in psychotic illness and close supervision of high-risk patients should accompany drug therapy. GEODON prescriptions should be written for the smallest quantity of capsules consistent with good patient management to reduce overdose risk. **Use in Patients with Concomitant Illness:** Clinical experience with GEODON in patients with certain concomitant systemic illnesses is limited. GEODON has not been evaluated or used to any appreciable extent in patients with a recent history of myocardial infarction or unstable heart disease. Patients with these diagnoses were excluded from premarketing clinical studies. Because of the risk of QTc prolongation and orthostatic hypotension with GEODON, caution should be observed in cardiac patients (see QT Prolongation and Risk of Sudden Death in WARNINGS and Orthostatic Hypotension in PRECAUTIONS). **Information for Patients:** To ensure safe and effective use of GEODON, the

information and instructions in the Patient Information Section should be discussed with patients. **Laboratory Tests:** Patients being considered for GEODON treatment who are at risk of significant electrolyte disturbances should have baseline serum potassium and magnesium measurements. Low serum potassium and magnesium should be repleted before treatment. Patients who are started on diuretics during GEODON therapy need periodic monitoring of serum potassium and magnesium. Discontinue GEODON in patients who are found to have persistent QTc measurements >500 msec (see WARNINGS). **Drug Interactions:** (1) GEODON should not be used with any drug that prolongs the QT interval. (2) Given the primary CNS effects of GEODON, caution should be used when it is taken in combination with other centrally acting drugs. (3) Because of its potential for inducing hypotension, GEODON may enhance the effects of certain antihypertensive agents. (4) GEODON may antagonize the effects of levodopa and dopamine agonists. **Effect of Other Drugs on GEODON:** **Carbamazepine:** 200 mg bid for 21 days, resulted in a decrease of approximately 35% in the AUC of GEODON. **Ketoconazole:** a potent inhibitor of CYP3A4, 400 mg qd for 5 days, increased the AUC and C<sub>max</sub> of GEODON by about 35%-40%. **Cimetidine:** 800 mg qd for 2 days, did not affect GEODON pharmacokinetics. Coadministration of 30 mL of Maalox did not affect GEODON pharmacokinetics. Population pharmacokinetic analysis of schizophrenic patients in controlled clinical trials has not revealed any clinically significant pharmacokinetic interactions with benzotropine, propranolol, or lorazepam. **Effect of GEODON on Other Drugs:** In vitro studies revealed little potential for GEODON to interfere with the metabolism of drugs cleared primarily by CYP1A2, CYP2C9, CYP2C19, CYP2D6, and CYP3A4, and little potential for drug interactions with GEODON due to displacement. GEODON 40 mg bid administered concomitantly with lithium 450 mg bid for 7 days did not affect the steady-state level or renal clearance of lithium. GEODON 20 mg bid did not affect the pharmacokinetics of concomitantly administered oral contraceptives, ethinyl estradiol (0.03 mg) and levonorgestrel (0.15 mg). Consistent with in vitro results, a study in normal healthy volunteers showed that GEODON did not alter the metabolism of dextromethorphan, a CYP2D6 model substrate, to its major metabolite, dextrorphan. There was no statistically significant change in the urinary dextromethorphan/dextrorphan ratio. **Carcinogenesis, Mutagenesis, Impairment of Fertility:** Lifetime carcinogenicity studies were conducted with GEODON in Long Evans rats and CD-1 mice. In male mice, there was no increase in incidence of tumors relative to controls. In female mice there were dose-related increases in the incidences of pituitary gland adenoma and carcinoma, and mammary gland adenocarcinoma at all doses tested. Increases in serum prolactin were observed in a 1-month dietary study in female, but not male, mice. GEODON had no effect on serum prolactin in rats in a 5-week dietary study at the doses that were used in the carcinogenicity study. The relevance for human risk of the findings of prolactin-mediated endocrine tumors in rodents is unknown (see Hyperlocomotion). **Mutagenesis:** There was a reproducible mutagenic response in the Ames assay in one strain of *S. typhimurium* in the absence of metabolic activation. Positive results were obtained in both the in vitro mammalian cell gene mutation assay and the in vitro chromosomal aberration assay in human lymphocytes. **Impairment of Fertility:** GEODON increased time to copulation in Sprague-Dawley rats in two fertility and early embryonic development studies at doses of 10 to 160 mg/kg/day (0.5 to 8 times the MRHD of 200 mg/day on a mg/m<sup>2</sup> basis). Fertility rate was reduced at 160 mg/kg/day (8 times the MRHD on a mg/m<sup>2</sup> basis). There was no effect on fertility at 40 mg/kg/day (2 times the MRHD on a mg/m<sup>2</sup> basis). The fertility of female rats was reduced. **Pregnancy—Pregnancy Category C:** There are no adequate and well-controlled studies in pregnant women. GEODON should be used during pregnancy only if the potential benefits justifies the potential risk to the fetus. **Labor and Delivery:** The effect of GEODON on labor and delivery in humans is unknown. **Nursing Mothers:** It is not known whether, and if so in what amount, GEODON or its metabolites are excreted in human milk. It is recommended that women receiving GEODON should not breast feed. **Pediatric Use:** The safety and effectiveness of GEODON in pediatric patients have not been established. **Geriatric Use:** Of the approximately 4500 patients treated with GEODON in clinical studies, 2.4% (109) were 65 years of age or over. In general, there was no indication of any different tolerability for GEODON or of reduced clearance of GEODON in the elderly compared to younger adults. Nevertheless, the presence of multiple factors that might increase the pharmacodynamic response to GEODON, or cause poorer tolerance or orthostasis, should lead to consideration of a lower starting dose, slower titration, and careful monitoring during the initial dosing period for some elderly patients. **ADVERSE REACTIONS**—**Lower Dose Findings Observed in Short-Term, Placebo-Controlled Trials:** The following findings are based on the short-term placebo-controlled premarketing trials for schizophrenia (a pool of two 6-week, and two 4-week fixed-dose trials) and bipolar mania (a pool of two 3-week flexible-dose trials) in which GEODON was administered in doses ranging from 10 to 200 mg/day. **Adverse Events Associated with Discontinuation:** Schizophrenia: Approximately 4.1% (29/702) of GEODON-treated patients in short-term, placebo-controlled studies discontinued treatment due to an adverse event, compared with about 2.2% (6/273) on placebo. The most common event associated with dropout was rash, including 7 dropouts for rash among GEODON patients (1%) compared to no placebo patients (see PRECAUTIONS). Bipolar Mania: Approximately 6.5% (18/279) of GEODON-treated patients in short-term, placebo-controlled studies discontinued treatment due to an adverse event, compared with about 3.7% (5/136) on placebo. The most common events associated with dropout in the GEODON-treated patients were akathisia, anxiety, depression, dizziness, dystonia, rash, and vomiting, with 2 dropouts for each of these events among GEODON patients (1%) compared to one placebo patient each for dystonia and rash (1%) and no placebo patients for the remaining adverse events. **Adverse Events at an Incidence ≥5% and at Least Twice the Rate of Placebo:** The most commonly observed adverse events associated with GEODON in schizophrenia trials were somnolence (14%) and respiratory tract infection (8%). The most commonly observed adverse events associated with the use of GEODON in bipolar mania trials were somnolence (31%), extrapyramidal symptoms (31%), dizziness (16%), akathisia (10%), abnormal vision (6%), asthenia (6%), and vomiting (5%). The following list enumerates the treatment-emergent adverse events that occurred during acute therapy, including only those events that occurred in ≥2% of GEODON patients and at a greater incidence than in placebo. Schizophrenia: **Body as a Whole**—asthenia, accidental injury, chest pain. **Cardiovascular**—tachycardia. **Digestive**—nausea, constipation, dyspepsia, diarrhea, dry mouth, anorexia. **Nervous**—extrapyramidal symptoms, somnolence, akathisia, dizziness. **Respiratory**—respiratory tract infection, rhinitis, cough increased. **Skin and Appendages**—rash, fungal dermatitis. **Special Senses**—abnormal vision. Bipolar Mania: **Body as a Whole**—headache, asthenia, accidental injury. **Cardiovascular**—hypertension. **Digestive**—nausea, diarrhea, dry mouth, vomiting, increased salivation, tongue edema, dysphagia. **Musculoskeletal**—myalgia. **Nervous**—somnolence, extrapyramidal symptoms, dizziness, akathisia, anxiety, hypesthesia, speech disorder. **Respiratory**—pharyngitis, dyspnea. **Skin and Appendages**—fungal dermatitis. **Special Senses**—abnormal vision. **Dose Dependency:** An analysis for dose response in the schizophrenia trials revealed an apparent relation of adverse event to dose for the following: asthenia, postural hypotension, anorexia, dry mouth, increased salivation, arthralgia, anxiety, dizziness, dystonia, hypertonía, somnolence, tremor, rhinitis, rash, and abnormal vision. **Extrapyramidal Symptoms (EPS):** The incidence of reported EPS for GEODON patients in the short-term, placebo-controlled schizophrenia trials was 14% vs 6% for placebo. Objectively collected data from those trials on the Simpson-Angus Rating Scale and the Barnes Akathisia Scale did not generally show a difference between GEODON and placebo. **Dystonia:** Prolonged abnormal contractions of muscle groups may occur in susceptible individuals during first few days of treatment. Dystonia may occur at any dose level but with greater frequency and severity with high potency and at higher doses of first generation antipsychotic drugs. Elevated risk is observed in males and younger age groups. **Vital Sign Changes:** GEODON is associated with orthostatic hypotension (see PRECAUTIONS). **Weight Gain:** In short-term schizophrenia trials—the proportions of patients meeting a weight gain criterion of ≥7% of body weight were compared, revealing a statistically significantly greater incidence of weight gain for GEODON patients (10%) vs placebo patients (4%). A median weight gain of 0.5 kg was observed in GEODON patients vs 0.0 kg in placebo patients. Weight gain was reported as an adverse event in 0.4% of both GEODON and placebo patients. During long-term therapy with GEODON, a categorization of patients at baseline on the basis of body mass index (BMI) showed the greatest mean weight gain and the highest incidence of clinically significant weight gain (>7% of body weight) in patients with a low BMI (<23) compared to normal (23-27) or overweight (>27) patients. There was a mean weight gain of 1.4 kg for patients with a "low" baseline BMI, 0.0 kg for patients with a "normal" BMI, and a 1.3 kg mean weight loss for patients with a "high" BMI. **ECG Changes:** GEODON is associated with an increase in the QTc interval (see WARNINGS). In schizophrenia trials, GEODON was associated with a mean increase in heart rate of 1.4 beats per minute compared to a 0.2 beats per minute decrease among placebo patients. **Other Adverse Events Observed During the Premarketing Evaluation of GEODON:** Frequent adverse events are those occurring in at least 1/100 patients; infrequent adverse events are those occurring in 1/100 to 1/1000 patients; rare events are those occurring in fewer than 1/1000 patients. Schizophrenia: **Body as a Whole**—Frequent: abdominal pain, flu syndrome, fever, accidental fall, face edema, chills, photosensitivity reaction, flank pain, pharyngitis, motor vehicle accident. **Cardiovascular System**—Frequent: tachycardia, hypertension, postural hypotension. Infrequent: bradycardia, angina pectoris, atrial fibrillation; Rare: first-degree AV block, bundle branch block, pleuritis, pulmonary embolism, cardiomegaly, cerebral infarct, cerebrovascular accident, deep thrombophlebitis, myocarditis, thrombophlebitis. **Digestive System**—Frequent: anorexia, vomiting; Infrequent: rectal hemorrhage, dysphagia, tongue edema; Rare: gum hemorrhage, jaundice, fecal impaction, gamma glutamyl transpeptidase increased, hematemeses, cholestatic jaundice, hepatitis, hepatomegaly, leukoplakia of mouth, fatty liver deposit, melena. **Endocrine**—Rare: hypothyroidism, hyperthyroidism, thyroiditis. **Hemic and Lymphatic System**—Infrequent: anemia, ecchymosis, leukocytosis, leukopenia, eosinophilia, lymphadenopathy; Rare: thrombocytopenia, hypochromic anemia, lymphocytosis, monocytosis, basophilia, lymphedema, polycythemia, thrombocytopenia. **Metabolic and Nutritional Disorders**—Infrequent: thirst, transaminase increased, peripheral edema, hyperglycemia, hyperlipidemia, creatine phosphokinase increased, alkaline phosphatase increased, hypercholesterolemia, dehydrated, lactic dehydrogenase increased, albuminuria, hypokalemia; Rare: BUN increased, creatinine increased, hyperlipidemia, hypohydrated, hypokalemia, hypochloremia, hypoglycemia, hyponatremia, hypoproteinemia, glucose tolerance decreased, gout, hypercholesterolemia, hyperuricemia, hypocalcemia, hypoglycemic reaction, hypomagnesemia, ketosis, respiratory alkalosis. **Musculoskeletal System**—Frequent: myalgia; Infrequent: tenosynovitis; Rare: myopathy. **Nervous System**—Frequent: agitation, extrapyramidal syndrome, tremor, dystonia, hypertonia, dyskinesia, hostility, twitching, restlessness, confusion, vertigo, hypokinesia, hyperkinesia, abnormal gait, oculogyric crisis, hypesthesia, ataxia, anisocoria, cogwheel rigidity, delirium, hallucinations, akinesia, dysarthria, withdrawal syndrome, buccoglossal syndrome, choreoathetosis, diplopia, incoordination, neuropathy; Infrequent: paralysis; Rare: myoclonus, nystagmus, torticollis, circumoral paresthesia, opisthotonos, reflexes increased, trismus. **Respiratory System**—Frequent: dyspnea; Infrequent: pneumonia, epistaxis; Rare: hemoptysis, laryngismus. **Skin and Appendages**—Infrequent: maculopapular rash, urticaria, alopecia, eczema, exfoliative dermatitis, contact dermatitis, vesiculobullous rash. **Special Senses**—Frequent: fungal dermatitis; Infrequent: conjunctivitis, dry eyes, tinnitus, blepharitis, cataract, photophobia; Rare: eye hemorrhage, visual field defect, keratitis, keratoconjunctivitis. **Urogenital System**—Infrequent: impotence, abnormal ejaculation, amenorrhea, hematuria, menorrhagia, female lactation, polyuria, urinary retention, metrorrhagia, male sexual dysfunction, anorgasmia, glycosuria; Rare: gynecostasis, vaginal hemorrhage, nocturia, oliguria, female sexual dysfunction, uterine hemorrhage. **Adverse Finding Observed in Trials of Intramuscular GEODON:** In these studies, the most commonly observed adverse events associated with the use of intramuscular GEODON (≥5% and observed at a rate on intramuscular GEODON (in the higher dose groups) at least twice that of the lowest intramuscular GEODON group were headache (13%), nausea (12%), and somnolence (20%). **Adverse Events at an Incidence >1% in Short-Term Fixed-Dose Intramuscular Trials:** The following list enumerates the treatment-emergent adverse events that occurred in ≥1% of GEODON patients (in the higher dose groups) and at least twice that of the lowest intramuscular GEODON group. **Body as a Whole**—headache, injection site pain, asthenia, abdominal pain, flu syndrome, back pain. **Cardiovascular**—postural hypotension, hypertension, bradycardia, vasodilation. **Digestive**—nausea, rectal hemorrhage, diarrhea, vomiting, dyspepsia, anorexia, constipation, tooth disorder, dry mouth. **Nervous**—dizziness, anxiety, insomnia, somnolence, akathisia, agitation, extrapyramidal syndrome, hypertonia, cogwheel rigidity, paresthesia, personality disorder, psychosis, speech disorder. **Respiratory**—rhinitis. **Skin and Appendages**—fungal infection, sweating. **Urogenital**—dysmenorrhea, priapism. **DRUG ABUSE AND DEPENDENCE—Controlled Substance Class:** GEODON is not a controlled substance. **OVERDOSAGE**—In premarketing trials in over 5400 patients, accidental or intentional overdosage of GEODON was documented in 10 patients. All patients survived without sequelae. In the patient taking the largest confirmed amount (3240 mg), the only symptoms reported were minimal sedation, slurring of speech, and transitory hypertension (BP 200/95).



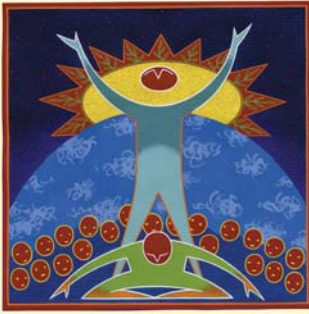

This program will be conducted on May 17, 2009, during the APA 2009 Annual Meeting

## DELIVERING OPTIMAL CARE FOR COMPLEX BIPOLAR PATIENTS:

### AN AUDIENCE-GUIDED SYMPOSIUM

**SUNDAY, MAY 17, 2009** | Lunch: NOON–12:30 PM | Symposium: 12:30–2:30 PM  
Westin St. Francis Hotel | Grand Ballroom (Mezzanine Level) | **SAN FRANCISCO, CALIFORNIA**

#### AGENDA

|                |                                                                                                                                   |              |                                                                                                             |
|----------------|-----------------------------------------------------------------------------------------------------------------------------------|--------------|-------------------------------------------------------------------------------------------------------------|
| NOON–12:30 PM  | Lunch                                                                                                                             | 1:15–1:35 PM | How Do We Know if Medications Are Working?<br><b>MICHAEL J. OSTACHER, MD, MPH</b><br>Harvard Medical School |
| 12:30–12:35 PM | Welcome and Introductions<br><b>GARY SACHS, MD (Chairperson)</b><br>Harvard Medical School                                        | 1:35–1:55 PM | How Do We Care for Complex Bipolar Patients?<br><b>GARY SACHS, MD</b><br>Harvard Medical School             |
| 12:35–12:55 PM | What Defines Quality of Care in Bipolar Disorder?<br><b>RICHARD C. HERMANN, MD, MS</b><br>Tufts University School of Medicine     | 1:55–2:30 PM | Question and Answer Session<br><b>ALL FACULTY</b>                                                           |
| 12:55–1:15 PM  | What Does the Payor's Data on Quality of Care Tell Us?<br><b>PHYLLIS GREENWALD, MD</b><br>Aetna Behavioral Health King of Prussia |              |                                                                                                             |

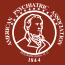

Sponsored by the American Psychiatric Association

Supported by an educational grant from

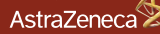

#### EDUCATIONAL ACTIVITY LEARNING OBJECTIVES

At the conclusion of this symposium, the participant should be able to:

- Describe the role of quality measures of care for bipolar disorder in quality improvement activities
- Review the payor's role in measuring and encouraging quality care for patients with bipolar disorder
- Describe a strategy for maximizing the use of effective treatment while minimizing the continued use of ineffective treatments
- Discuss how a multimodal approach can be used to deliver improved quality of care for this disease

#### CME STATEMENT

This symposium will be conducted on May 17, 2009, during the APA 2009 Annual Meeting. The American Psychiatric Association (APA) is accredited by the Accreditation Council for Continuing Medical Education to provide continuing medical education for physicians. The APA designates this educational activity for a maximum of 2 *AJVA PRA Category 1 Credits*™. Physicians should only claim credit commensurate with the extent of their participation in the activity. Attendees must be registered for the APA Annual Meeting to attend this symposium. Seating is limited and will be based on first-come, first-served. For more information about the meeting, please visit the APA Web site at [www.psych.org](http://www.psych.org) or contact the APA toll free at 1-888-357-7924 (within the US or Canada) or 703-907-7300.

If any participant of this activity given by The France Foundation is in need of accommodation, please fax written requests to 1-860-434-5390.

## Isaac Ray Award

The American Psychiatric Association and the American Academy of Psychiatry and the Law invites nominations for the Isaac Ray Award for 2010. This Award honors Dr. Isaac Ray, one of the original founders and the fourth President of the American Psychiatric Association, and is presented to a person who has made outstanding contributions to forensic psychiatry or to the psychiatric aspects of jurisprudence. The Award, which will be presented at the Convocation of Fellows at the Annual Meeting of the American Psychiatric Association in New Orleans, LA, in May 2010, includes an honorarium of \$1,500. The recipient obligates him or herself to deliver a lecture or series of lectures on these subjects and to present the manuscript for publication.

Nominations are requested as follows:

- a primary nominating letter (sent with the consent of the candidate), which includes a curriculum vitae and specific details regarding the candidate's qualifications for the Award; and
- a supplemental letter from a second nominator in support of the candidate.

Additional letters related to any particular candidate will not be accepted or reviewed by the Award Committee. Nominators should not submit letters on behalf of more than one candidate. Nominations will be kept in the pool of applicants for two years.

**The deadline for receipt of nominations is July 1, 2009.**

Nominations, as outlined above, should be submitted to:

**J. Richard Ciccone, M.D.**  
Chairperson  
Isaac Ray Award Committee  
American Psychiatric Association  
1000 Wilson Boulevard, Suite 1825  
Arlington, VA 22209

## Psychiatrists Without Borders

A Nonprofit Organization

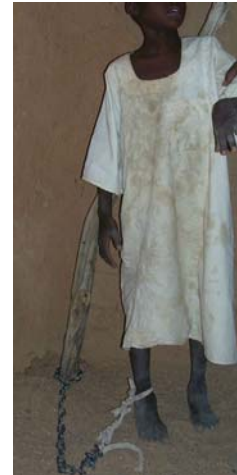

African boy chained to a post as a means to control a chronic mental condition.

*Where no mental health care or education exists harsh practices may be used to manage treatable conditions.*

*Support our efforts to increase access to care and education & to decrease illness, stigma, and abuse.*

Visit Our "Positive Images" Photo Exhibit  
at the APA 162<sup>nd</sup> Annual Meeting in San Francisco  
Booth #1140

[www.orgwww.psychiatristswithoutborders.org](http://www.orgwww.psychiatristswithoutborders.org)

# Professor of Psychiatry

Department of Psychiatry  
Judge Baker Children's Center and Harvard Medical School

The Department of Psychiatry at the Judge Baker Children's Center and Harvard Medical School are seeking a researcher at the professorial level to investigate specifically the effects of malnutrition on development and mental health. The researcher should hold an MD or PhD degree with a preference for an MD. He/she should have a proven track record in studying malnutrition and other related adversities that affect the long-term development of children. Candidates must have a national or international reputation and scholarly achievements appropriate for appointment at the level of Professor at Harvard Medical School. The applicant will be expected to pursue his/her own program of extramurally-funded research and to develop collaborative projects within the Judge Baker Children's Center and the larger Harvard community. A focus both on high quality research and on malnutrition are consistent with the Judge Baker Children's Center mission to conduct research on factors associated with children's mental health and to generate knowledge that can inform interventions and services for children, particularly the most disadvantaged. Academic appointment will be through the Department of Psychiatry at Children's Hospital Boston.

Please submit CV and letter of interest to:

**Dr. William R. Beardslee**  
Chairman, Search Committee, Department of Psychiatry  
Children's Hospital Boston  
21 Autumn Street  
Boston, Massachusetts 02215

*The Judge Baker Children's Center and Harvard Medical School are equal opportunity employers. Women and minorities are welcome to apply.*

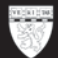

HARVARD MEDICAL SCHOOL

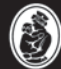

Children's Hospital Boston

## PSYCHIATRISTS

The VA Needs You

Shreveport, LA  
Alexandria, LA  
Biloxi, MS  
Jackson, MS

Pensacola, FL  
Mt. Vernon, MO  
Muskogee, OK

Fayetteville, AR  
Fort Smith, AR  
Mobile, AL

Psychiatrist positions require: BE/BC Psychiatrists, current, full, unrestricted licensure (any state), U.S. citizen Great Benefits, Excellent Pay, Rewarding Work. See announcements on [www.vacareers.va.gov](http://www.vacareers.va.gov). Recruitment/Relocation incentives may be authorized, ask contact individual for details.

**BILOXI/PENSACOLA** Outpatient and Inpatient Psychiatry positions. Expertise in substance abuse, geropsychiatry and PTSD preferred. BE/BC psychiatrist, state license (any state), U.S. citizen or permanent resident. Send applications to Jean Williams, HRMS (05A), 400 Veterans Avenue, Biloxi, MS or contact at [jean.williams@med.va.gov](mailto:jean.williams@med.va.gov) or (228) 523-5633.

**ALEXANDRIA** Strong Clinical Skills. Prefer experience in General Outpatient, Inpatient Psychiatry, and Substance Abuse. CV/Application to [heather.ball@va.gov](mailto:heather.ball@va.gov) or mail to Heather Ball/Psychiatry Service (116), P.O. Box 69004, Alexandria, LA 71306-9004. For additional questions, please call (318) 466-2958.

**SHREVEPORT** Prefer experience in general psychiatry, including inpatient, outpatient, consultative, or telemedicine psychiatry. Interested candidates should submit a CV to Sherri Collier, Human Resources (05), Overton Brooks VA Medical Center, 510 E. Stoner Ave, Shreveport, LA 71101 or via email: [sherri.collier@va.gov](mailto:sherri.collier@va.gov) phone: (318) 990-5147.

**FAYETTEVILLE, FORT SMITH, ARKANSAS; BRANSON, MISSOURI**  
Contact Betty Gray (479)443-4301 ext 5188 or email: [betty.gray@va.gov](mailto:betty.gray@va.gov)

**MUSKOGEE, OK** Contact Jason Cleveland, HRMS at 918-577-3800.

**JACKSON, MISSISSIPPI** Duties may involve several aspects of general psychiatry, including inpatient, outpatient, consultative, or telemedicine psychiatry. Interested candidates should submit a CV to Felicia Owens, Human Resources (05P), VA Medical Center, 1500 E. Woodrow Wilson Dr., Jackson, MS 39216 or [Felicia.owens@va.gov](mailto:Felicia.owens@va.gov) phone: 601-364-1575. Equal Opportunity Employer.

## New Zealand Health Careers

[www.zest4life.co.nz](http://www.zest4life.co.nz)

### Specialist Psychiatrist

Infant, Child and Adolescent Mental Health Service

Position No. 50901-44006

We are seeking a Specialist Psychiatrist enthusiastic about working in child and adolescent mental health, with a strong interest in young people experiencing mental health and/or addictions problems involved with youth justice systems. You would be a valued member of a dynamic multidisciplinary team.

Position requirements:

- Recognised Fellow with RANZCP
- Vocational Registration with NZ Medical Council
- Commitment to working within a Treaty of Waitangi based framework.

We welcome applications from experienced psychiatrists, and those interested in extending their skills in child and adolescent psychiatry.

Closing date: Open

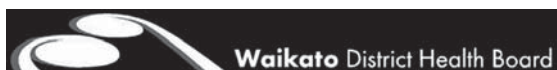

Make sure you visit our website at [www.waikatodhb.govt.nz](http://www.waikatodhb.govt.nz)  
to view all of our current vacancies, or alternatively send us an enquiry by  
e-mail to [zest4life@waikatodhb.govt.nz](mailto:zest4life@waikatodhb.govt.nz)

Apply online at [www.zest4life.co.nz](http://www.zest4life.co.nz)

## PARTNER WITH A MAGNET HOSPITAL

BC/BE Psychiatrist needed to serve as Medical Director of an 11-bed Inpatient Behavioral Health Services Unit and to add capacity for our Outpatient Program.

Call is shared with 5 local psychiatrists. Practice is located at Aspirus Wausau Hospital, named in the top 100 hospitals in the USA by *US News and World Report*. Work with a great team of young, vibrant psychiatrists. There is great potential for program growth and development with a focus on expanded community action. Excellent compensation and benefit package included.

As you work within the open and inviting architecture of Aspirus, you will be part of our outstanding award-winning facility. We invite you to join a first-rate medical community and a family-friendly quality of life in north central Wisconsin.

Please contact Jamie Sitko today at 800-792-8728 or fax CV to 715-847-2742.

Email: [jamiesi@aspirus.org](mailto:jamiesi@aspirus.org)  
[www.aspirus.org](http://www.aspirus.org)

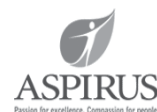

## #1 Integrated Health System

- ✓ Top 10 Clinic!
- ✓ Top 10 Hospital
- ✓ Low Cost Living

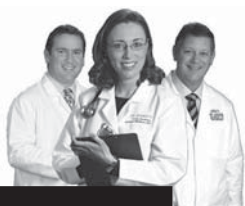

- Flexible Scheduling
- Family Friendly practice and community of 200K
- 30 Bed Inpatient Unit

A Psychiatrist, BC / BE, is being sought to join a three-physician Adult practice. Enjoy your life and practice with long-term physicians and staff. St. John's Clinic is a 480 physician multi-specialty clinic offering a very large referral base!

St. John's Regional Health Center, Springfield, Missouri is an 886-bed, level-one trauma center. St. John's Hospital serves as a referral hospital for 6+ regional hospitals serving 40 communities and covering 25,000 square miles.

SPRINGFIELD, MISSOURI, is located three hours south and southwest of Kansas City and St. Louis, respectively. A growing mid-sized city in the foothills of the Ozark Mountains, Springfield offers everything from Broadway performances and minor league and Division I athletics to outstanding schools and some of the best outdoor sporting opportunities available. Employment Review named Springfield one of the 20 "Best Places to Live and Work" in the U.S. Housing costs, projected job growth, education, healthcare, taxes, recreation, the arts, and general cost of living rates, make living and working here a pleasure. For more information about Springfield, go to [www.springfieldmo.org](http://www.springfieldmo.org).

### For more information, please contact:

**Julie A. Oliver,**  
Physician Recruiter  
St. John's Clinic  
Phone: 800-218-5079  
Fax: 888-290-8300  
E-mail: [JAoliver@mercy.net](mailto:JAoliver@mercy.net)  
EOE/AA Employer

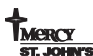

ST. JOHN'S  
Clinic

## We are recruiting Psychiatrists!

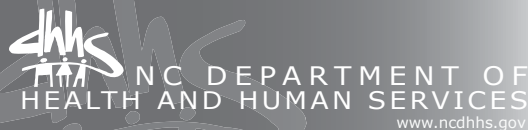

Complex cases...specialized treatment...an opportunity for the best of the best to rise to the challenge! If altruism...compassion...and a strong desire to make a dramatic difference in the lives of your patients matters to you...then consider joining our team.

As a Psychiatrist at one of our facilities, you will serve as an integral member of an interdisciplinary team, developing comprehensive treatment plans to address the individual, social, medical, and vocational needs of patients.

In addition, you will work in affiliation with prominent residency programs such as the University of North Carolina-Chapel Hill, Duke University, and East Carolina University. We offer child adolescent, adult admissions, forensic and rehabilitation services at our hospitals.

From the mountains to the coast, we employ Psychiatrists at the following Hospitals and Alcohol & Drug Abuse Treatment Centers (ADATC):  
•Broughton Hospital • Central Regional Hospital • Cherry Hospital  
•Walter B. Jones ADATC •R.J. Blackley ADATC • Julian F. Keith ADATC

Competitive pay and comprehensive state benefits including the following:

- Loan Repayment Program
- Flexible Scheduling
- Special Pay Incentives
- Medical Malpractice Insurance

For more information visit: [www.ncdhhs.gov](http://www.ncdhhs.gov) or  
contact Michael Taylor at 919.733.2040 or  
[mtaylor@ncfahp.org](mailto:mtaylor@ncfahp.org)

North Carolina State Government Employer of Choice EOE/AA Employer

## BOARD-CERTIFIED / BOARD-ELIGIBLE PSYCHIATRIST

The **VA Medical Center** is looking for a Board Certified Board Eligible Psychiatrist. This person will serve as a member of a multidisciplinary team. He/she will focus on the assessment/evaluation and medication management of veterans who suffer from mental health conditions, i.e., post traumatic stress disorder (PTSD), substance abuse, depression, anxiety and other related conditions.

Candidate will provide clinical assessment/evaluation of veterans with difficult and complex mental health issues and then selecting from a variety of resources and clinical approaches including non-direct and cognitive behavior therapy, behavioral modification, insight oriented methods, family therapy, medication management, etc.

The applicant selected for this position may be eligible for education debt reduction program; approval is subject to availability of funds. Recruitment/relocation bonus is authorized for a highly qualified candidate. If interested please contact:

**VA Medical Center**  
2121 North Avenue  
Grand Junction CO 81501  
Phone: (970) 263-5068 or  
Phone: (970) 263-5062

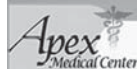

## Great Opportunity Beautiful Las Vegas!

### PSYCHIATRIST

Multi-speciality group seeking friendly motivated second Psychiatrist.

Competitive compensation package including: Medical/dental insurance, 401K paid malpractice, paid vacation/CME, relocation assistance, etc.

Main office at Central Las Vegas  
JI/H Visa May Apply!

Fax Resume to: 702-947-6702  
Or E-mail: [drez@apexmedicalcenter.net](mailto:drez@apexmedicalcenter.net)

**APEX MEDICAL CENTER**



## Academic Leadership Opportunities in the Department of Psychiatry

The Department of Psychiatry and its UBC Institute of Mental Health (IMH) in the Faculty of Medicine at the University of British Columbia (UBC) is recruiting to fill a number of positions in Vancouver, British Columbia, Canada. Vancouver is situated on the west coast of Canada and has been named one of the most desirable places to live in the world.

There are a number of outstanding opportunities for individuals including:

- UBC Endowed IMH Chair – Geriatric Psychiatry - full-time, tenure/tenure track
- UBC Endowed IMH Chair - Child and Adolescent Psychiatry - full-time, tenure/tenure track
- UBC Endowed IMH Chair – Psychotherapy - full-time, tenure/tenure track
- Two (2) full-time tenure track faculty positions in the UBC Department of Psychiatry

### UBC Endowed Chairs

#### The UBC Department of Psychiatry and its UBC Institute of Mental Health

The UBC Institute of Mental Health, in the Department of Psychiatry has the mandate to create new knowledge relevant to mental illnesses and to translate this into improved preventative, diagnostic and therapeutic clinical strategies. An immediate objective of the Institute is to recruit three outstanding faculty members as clinician scientists to UBC and the Province of British Columbia in the areas of: **(1) Child and Adolescent Psychiatry, (2) Geriatric Psychiatry and (3) Psychotherapy.** These new chairs will join a team of clinical and basic science colleagues and clinicians already in place at UBC and the Provincial Health Services Authority including 3 Canada Research Chairs in Neuroscience, BC Leading Edge Endowment Fund Chairs in Depression Research and Addictions, and additional endowed Chairs/Professorships and a numerous clinicians in all areas of Psychiatric care.

The successful candidates will establish collaborative and innovative research programs to meet the mandate of the Institute as well as participate in the undergraduate and post graduate teaching activities of the Department of Psychiatry. The Chairs will become founding members of the UBC Institute of Mental Health and will play a key leadership role within the UBC Department of Psychiatry Programs in which they will be members.

The successful candidates must have the appropriate qualifications and an outstanding record of accomplishments in research, education and clinical care and an international reputation for excellence and leadership. We expect to fill these positions at the rank of full Professor; however, candidates with a promising record of achievement will also be considered for a position at the rank of Associate Professor. The Chairs will be appointed to tenure/tenure track positions with an anticipated start date of July 1, 2009 with an application deadline of May 31, 2009. Salary and rank will be commensurate with qualifications and experience and are subject to final University and budgetary approval.

Opportunities within the Provincial Health Services Authority or Vancouver Coastal Health Authority in clinical care activities are possible.

### Full-time Tenure/Tenure Track Positions – UBC Department of Psychiatry

The UBC Department of Psychiatry is recruiting for up to two (2) full-time faculty positions at the rank of Assistant or Associate Professor. These clinician or basic scientist positions will be aligned with the Department's strategic priorities to increase our commitment to clinical and basic research; enhance clinical care through translation of science into practice; enhance our educational programs and build capacity to develop exceptional teachers; build and grow our commitment to our community and our partners. We expect that one position will be appointed in the Basic Neuroscience Division and one position will be appointed in the Clinical and Behavioural Neuroscience Division in one of the clinical programs.

The successful candidates will have a record of accomplishments in research, education and clinical care and will establish collaborative and innovative research programs focused on clinical and translational research, as well as participating in the undergraduate and post graduate teaching activities of the Department of Psychiatry.

The successful candidates must have the appropriate qualifications (MD and/or PhD) and clinician scientist applicants must be certified by the Royal College of Physicians and Surgeons of Canada as a Psychiatrist or be eligible for RCPSC Academic Certification in Psychiatry upon appointment.

Candidates will be appointed to a tenure or tenure track position with an anticipated start date of July 1, 2009 with an applications deadline of May 31, 2009. Salary and rank will be commensurate with qualifications and experience and are subject to final University and budgetary approval.

Opportunities within the Provincial Health Services Authority or Vancouver Coastal Health Authority to participate in clinical care activities are possible and encouraged.

\*

UBC hires on the basis of merit and is committed to employment equity. We encourage all qualified persons to apply. However, Canadians and permanent residents of Canada will be given priority.

Applications should include curriculum vitae, a letter identifying the position of interest that includes a description of research interests and plans, evidence of teaching effectiveness and three letters of reference. Application materials should be sent to:

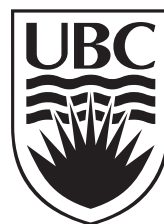

**Dr. L. Trevor Young, Professor and Head**  
**c/o Janie McCallum**  
**Department of Psychiatry**  
**Detwiller Pavilion, Room 2C1**  
**2255 Wesbrook Mall**  
**Vancouver, B.C. V6T 2A1**  
**Phone: 604-822-7310**  
**E-mail: [janie.mccallum@ubc.ca](mailto:janie.mccallum@ubc.ca)**

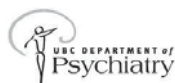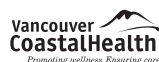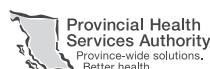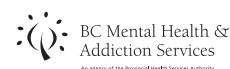

## ATASCADERO STATE HOSPITAL

### BE/BC Psychiatrist

Atascadero State Hospital now pays board certified psychiatrists starting at \$223,464 and advancing stepwise to \$255,732. Atascadero is the nation's premier center for the treatment of forensically committed mentally ill patients. Our hospital is a teaching site affiliated with the University of California, accredited by JCAHO, and recipient of the prestigious Codman Award. All of our psychiatrists are board eligible and most are board certified. Many of our psychiatrists have forensic subspecialty boards.

We are located midway between San Francisco and Los Angeles on the scenic central California Coast, south of Big Sur. We offer a spectacularly beautiful environment in San Luis Obispo County with temperate climate, beaches, world class wineries, cultural activities, golfing, sailing, riding, clean air, and excellent schools through the University level.

Our benefit package is valued at an additional 30%, which includes retirement plans (including safety retirement), health plans, professional liability coverage, paid holidays, educational leave, and generous annual leave. On-call duty is compensated hour for hour over and above the base salary. Applicants must hold a current California license, or have pending application with the Medical Board of California.

For a prompt and confidential review, send CV to:

**Jeanne Garcia, M.D.**

P. O. Box 7001

Atascadero, CA 93423-7001

(805) 468-2005 or fax (805) 468-2138

or e-mail us: [jeanne.garcia@ash.dmh.ca.gov](mailto:jeanne.garcia@ash.dmh.ca.gov)

WE ARE AN EQUAL OPPORTUNITY EMPLOYER.

## New Titles in GERIATRIC Psychiatry

### The American Psychiatric Publishing Textbook of Geriatric Psychiatry, Fourth Edition

Edited by **Dan G. Blazer, M.D., Ph.D.,** and **David C. Steffens, M.D., M.H.S.**

2009 • 720 pages • ISBN 978-1-58562-277-1 • Hardcover  
\$149.00 • Item #62277

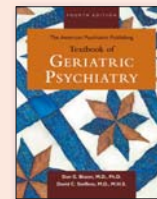

### Study Guide to Geriatric Psychiatry

A Companion to The American Psychiatric Publishing Textbook of Geriatric Psychiatry, Fourth Edition

**Robert E. Hales, M.D., M.B.A., Narriman C. Shahrokh, Dan G. Blazer, M.D., Ph.D.,** and **David C. Steffens, M.D., M.H.S.**

2009 • 240 pages • ISBN 978-1-58562-352-5 • Paperback  
\$49.00 • Item #62352

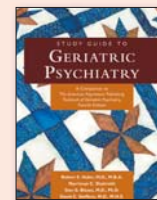

### The American Psychiatric Publishing Textbook of Alzheimer Disease and Other Dementias

Edited by **Myron F. Weiner, M.D.,** and **Anne M. Lipton, M.D., Ph.D.**

2009 • 560 pages • ISBN 978-1-58562-278-8 • Hardcover  
\$125.00 • Item #62378

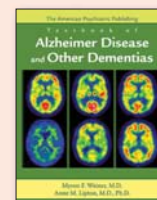

Order Online: [www.appi.org](http://www.appi.org)

Toll Free: 1-800-368-5777 ■ Fax: 703-907-1091 ■ Email: [appi@psych.org](mailto:appi@psych.org)

**American Psychiatric Publishing, Inc.**  
The First and Last Word in Psychiatry  
1000 Wilson Boulevard, Suite 1825, Arlington, VA 22209-3901

Priority Code AH912

## Rush Medical College/Rush University Medical Center

### CHAIR, DEPARTMENT OF PSYCHIATRY

**Rush Medical College at Rush University Medical Center** is seeking outstanding candidates for the position of Endowed Professor and Chair of the Department of Psychiatry. The Department is founded on a long tradition of excellence in clinical care, research and teaching. Currently, there are five endowed chairs in the department. The Department Chair has oversight over the Sections of Adult and Child Psychiatry. **Rush** is committed to providing outpatient and inpatient psychiatry services, with separate inpatient units for geriatric psychiatry; adult affective disorders, general psychiatry, and child psychiatry. The Chair also has responsibility for fully accredited training programs in Adult Psychiatry and Child Psychiatry.

Candidates must have an outstanding record of commitment to clinical service and research, and substantial administrative experience with an established national reputation as an academic leader. A commitment to advancement of the Department's research mission is also important. In addition, candidates must possess a commitment to innovation in the field and the leadership skills necessary for faculty development and advancement of clinical and academic missions.

**Rush Medical College** is one of the oldest medical colleges, established in 1837, and one of the largest private academic medical centers in Illinois. The Rush System for Health encompasses an 824 bed hospital serving adults and children, the 110 bed Johnston R. Bowman Center, Rush University, and four affiliate hospitals. **Rush** is a thriving center for basic and clinical research, with a newly built state-of-the-art research facility and over 1,600 active investigations.

In 2004, **Rush University Medical Center** in Chicago initiated its plan for the most comprehensive construction and facilities renovation program in its history. The "Rush Transformation" refers to Rush's plans to invest in new technology and build new facilities. This nine-year project will thoroughly redefine our physical plant and technology, as well as many of the processes we use to deliver patient care safely and efficiently.

We encourage women and minorities to apply. Nominations or letters of interest that include curriculum vitae should be sent to:

Julie Karstrand  
Staff Support for Search/Office of the Dean  
Rush University Medical Center  
600 South Paulina • Chicago, Illinois 60612

Or preferably electronically to: [Julie\\_Karstrand@rush.edu](mailto:Julie_Karstrand@rush.edu)

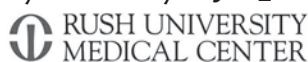

CVs should be submitted no later than **April 30, 2009**

Rush is an equal opportunity/Affirmative Action employer



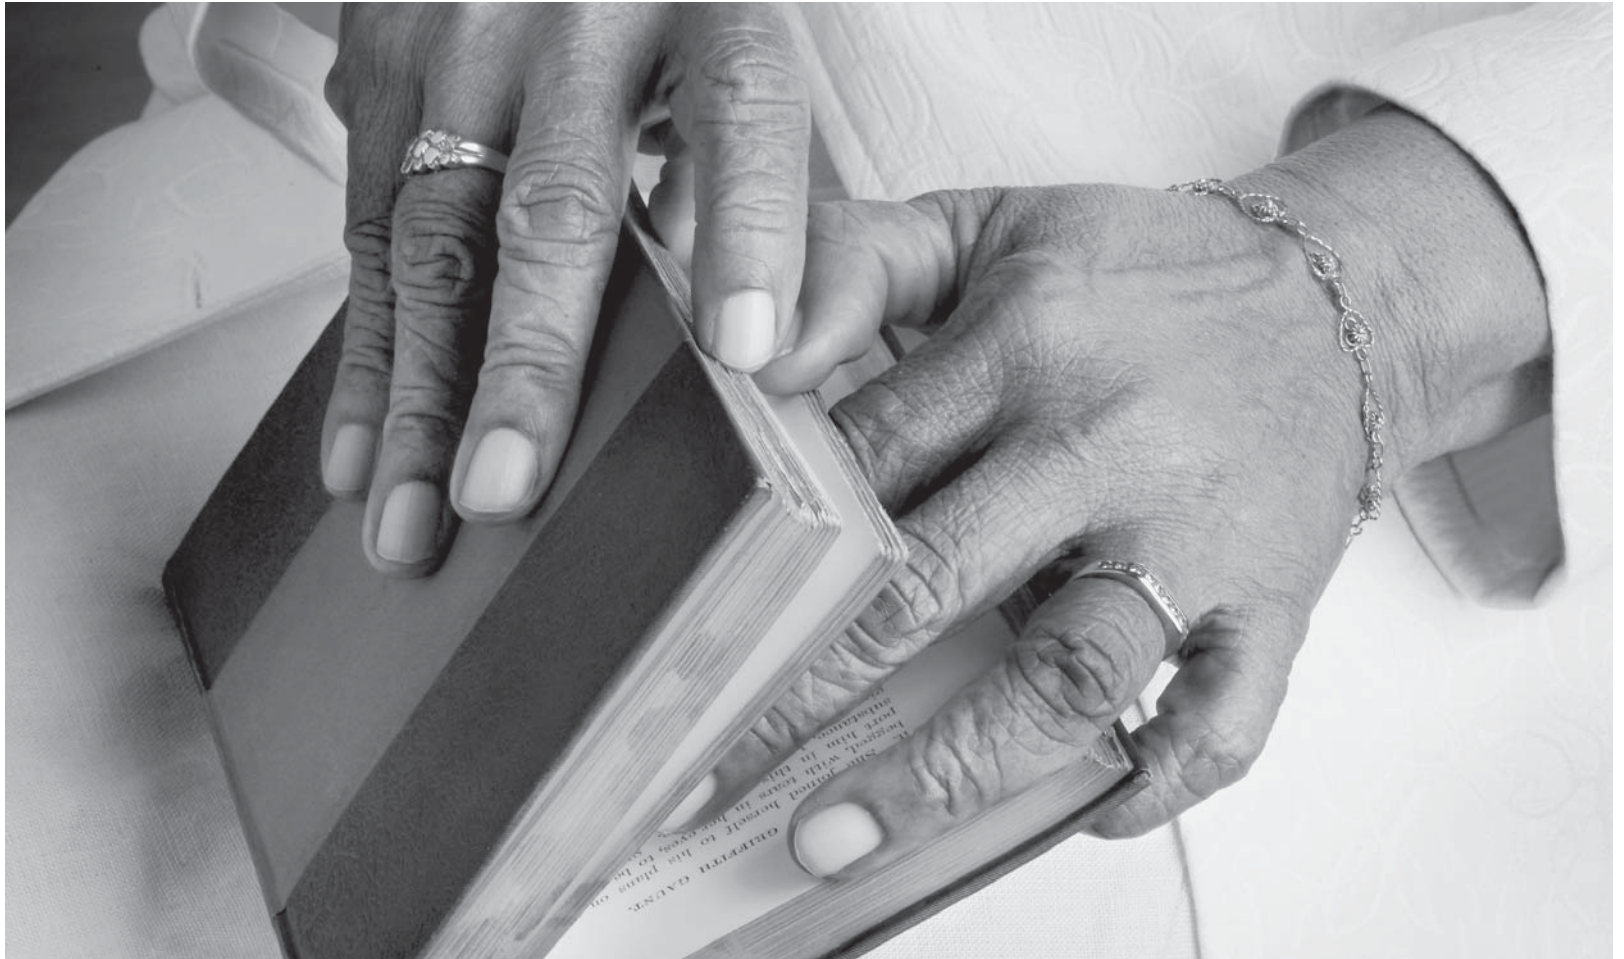

## Complex puzzles. Comprehensive solutions.

At Western Psychiatric Institute and Clinic of UPMC, we take on complex disorders that some other centers won't even attempt to treat.

But whether a patient has a difficult-to-treat disorder or one more easily treated, teams of specialists in psychiatry, psychopharmacology, clinical psychology, and medicine craft complete, individualized treatment plans that draw upon the latest clinical research, much of it conducted by our own investigators. Whether we're interpreting our clinical trial data or a patient's lab results, our work to advance the understanding and treatment of bipolar disorder,

eating disorders, autism, and geriatric behavioral health issues is world-class. In fact, we have one of the world's most comprehensive programs for mood disorders, with research-based treatments for patients at every level of need, at every stage of life.

With more than 400 inpatient psychiatric beds and 75 ambulatory programs, we care for people when they're feeling their worst *and* support them when they're at their best, back with their families in their home towns. Each year, Western Psychiatric helps some 30,000 people of all ages — at all stages of recovery, from all over the world — live healthier and more productive lives.

# UPMC

upmc.com | 1-800-533-UPMC

Affiliated with the **University of Pittsburgh School of Medicine**, UPMC is ranked among the nation's best hospitals by *U.S. News & World Report*.

# Index to Advertisers

## April 2009

The publication of an advertisement in this journal does not imply endorsement of the product or service by the American Psychiatric Association.

Employment Opportunities .....A17-A21

Psychiatrists Without Borders.....A13

Symposia .....A7, A13

SZ Magazine ..... A8

University of North Carolina Chapel Hill .....A7

U.S. Pharmaceuticals, Pfizer Inc.

Geodon IM ..... A9-A10

### Subscription and Business Information

The American Journal of Psychiatry, ISSN 0002-953X, is published monthly by the American Psychiatric Association, 1000 Wilson Blvd., Suite 1825, Arlington, VA 22209-3901. Subscriptions (per year): individual \$205.00, international \$308.00. For additional subscription options, including single issues and student rates, please contact Customer Service at 1-800-368-5777 or email [appi@psych.org](mailto:appi@psych.org). Institutional subscriptions are tier priced. For institutional site license or pricing information, contact Customer Service or visit <http://highwire.stanford.edu/tfocus/>.

Business communications, address changes, and subscription questions from APA members should be directed to the Division of Member Services: (888) 35-PSYCH (toll-free). Nonmember subscribers should call the Circulation Department (800) 368-5777. Author inquiries should be directed to the Journal editorial office: (703) 907-7885 or (703) 907-7884; fax (703) 907-1096; e-mail [ajp@psych.org](mailto:ajp@psych.org).

Business Management: Nancy Frey, Director, Publishing Services; Laura G. Abedi, Associate Director, Production; Alison Jones, Advertising Prepress Manager; Robert Pursell, Director, Sales and Marketing.

Pharmaceutical Print Advertising: Frank Cox, Kathleen Harrison, Valentin Torres, Pharmaceutical Media, Inc. 30 East 33rd Street, New York, NY 10016. (212) 685-5010; fax (212) 685-6126; e-mail [vtorres@pminy.com](mailto:vtorres@pminy.com).

Nonpharmaceutical and Online Sales: Brian Skepton, (703) 907-7332; e-mail [bskepton@psych.org](mailto:bskepton@psych.org).

Pages are produced using Adobe FrameMaker+ SGML 6.0. Printed by RR Donnelley, Mendota, IL., on acid-free paper effective with Volume 164, Number 11, November 2007.

Periodicals postage paid at Arlington, VA, and additional mailing offices. POSTMASTER: Send address changes to The American Journal of Psychiatry, Circulation Department, American Psychiatric Association, 1000 Wilson Blvd., Suite 1825, Arlington, VA 22209-3901.

Indexed in Abstracts for Social Workers, Academic Abstracts, Biological Abstracts, Chemical Abstracts, Chicago Psychoanalytic Literature Index, Cumulative Index to Nursing Literature, Excerpta Medica, Hospital Literature Index, Index Medicus, International Nursing Index, Nutrition Abstracts, Psychological Abstracts, Science Citation Index, Social Science Source, and Social Sciences Index.

The American Psychiatric Association does not hold itself responsible for statements made in its publications by contributors or advertisers. Unless so stated, material in The American Journal of Psychiatry does not reflect the endorsement, official attitude, or position of the American Psychiatric Association or of the Journal's Editorial Board.

Authorization to photocopy items for internal or personal use, or the internal or personal use of specific clients, is granted by the American Psychiatric Association for libraries and other users registered with the Copyright Clearance Center (CCC) Transactional Reporting Service, provided that the base fee of \$15.00 per copy is paid directly to CCC, 222 Rosewood Drive, Danvers, MA 01923; (978) 750-8400 (tel), (978) 646-8600 (fax), [www.copyright.com](http://www.copyright.com) (web site). 0002-953X/05/\$15.00.

This consent does not extend to other kinds of copying, such as copying for general distribution, for advertising or promotional purposes, for creating new collective works, or for resale. Requests for commercial distribution should be directed to (703) 907-7894. APA does not require that permission be obtained for the photocopying of isolated articles for nonprofit classroom or library reserve use; all fees associated with such permission are waived.

Copyright © 2009 American Psychiatric Association.



# AMERICAN PSYCHIATRIC ASSOCIATION

## 2009 ANNUAL MEETING ONLINE Your One-Stop Educational eResource Library

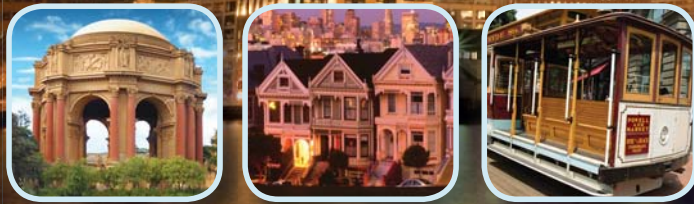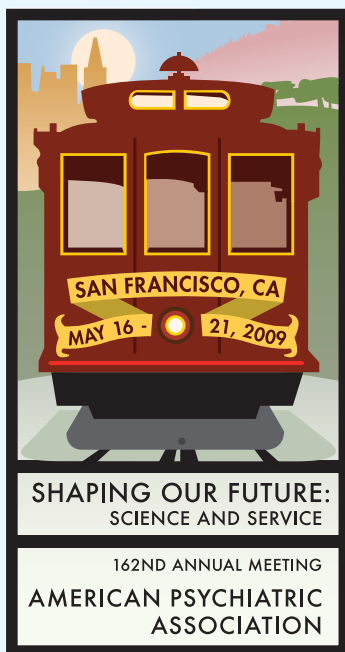

- Audio-visual programs conveniently available 24/7
- Special attendee pricing available
- Includes up to 100 hours of new 2009 meeting highlights
- Review presentations from world renowned faculty
- Earn CME credit\*
- Free online access to selected Industry-Supported Symposia

**For more information visit  
the booths located in the  
South Hall or in  
Hall D, Exhibit Level.**

\*The American Psychiatric Association is accredited by the ACCME to provide Continuing Medical Education for physicians. The APA designates (each of the presentations) in this educational activity for a maximum of 1-3 AMA PRA Category 1 Credits™. Physicians should only claim credit commensurate with the extent of their participation in the activity.

**THE APA ANNUAL MEETING ONLINE [WWW.PSYCH.ORG/AMLIBRARY](http://WWW.PSYCH.ORG/AMLIBRARY)**

# Employers and Candidates Connect through the APA Job Bank

## Employers

- ▶ Post your psychiatric position with the APA Job Bank at [psych.org/jobbank](http://psych.org/jobbank) and reach qualified professionals.
- ▶ Use the many resources of the APA Job Bank to make a smart recruitment decision.
- ▶ Advertise in the *Psychiatric Services* or *Psychiatric News* classifieds and the APA Job Bank and receive a 10% discount on each.
- ▶ Post your psychiatric position with the APA Job Bank before the APA Annual Meeting in San Francisco, May 16-21, and use the Conference Connection to set up interviews with candidates at the meeting.

## Candidates

- ▶ Search the most comprehensive online listing of psychiatric positions at [psych.org/jobbank](http://psych.org/jobbank).
- ▶ Register to post your resume, receive instant job alerts, use the career tools and more.
- ▶ Visit the APA Job Bank and find the ideal position.
- ▶ Use the APA Job Bank's Conference Connection to contact prospective employers and set up interviews at the APA Annual Meeting in San Francisco, May 16-21.

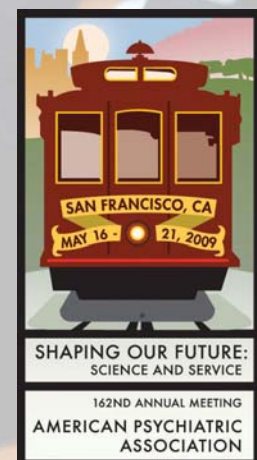

Call 703-907-7330 to post your psychiatric position
