# THE AMERICAN JOURNAL OF PSYCHIATRY

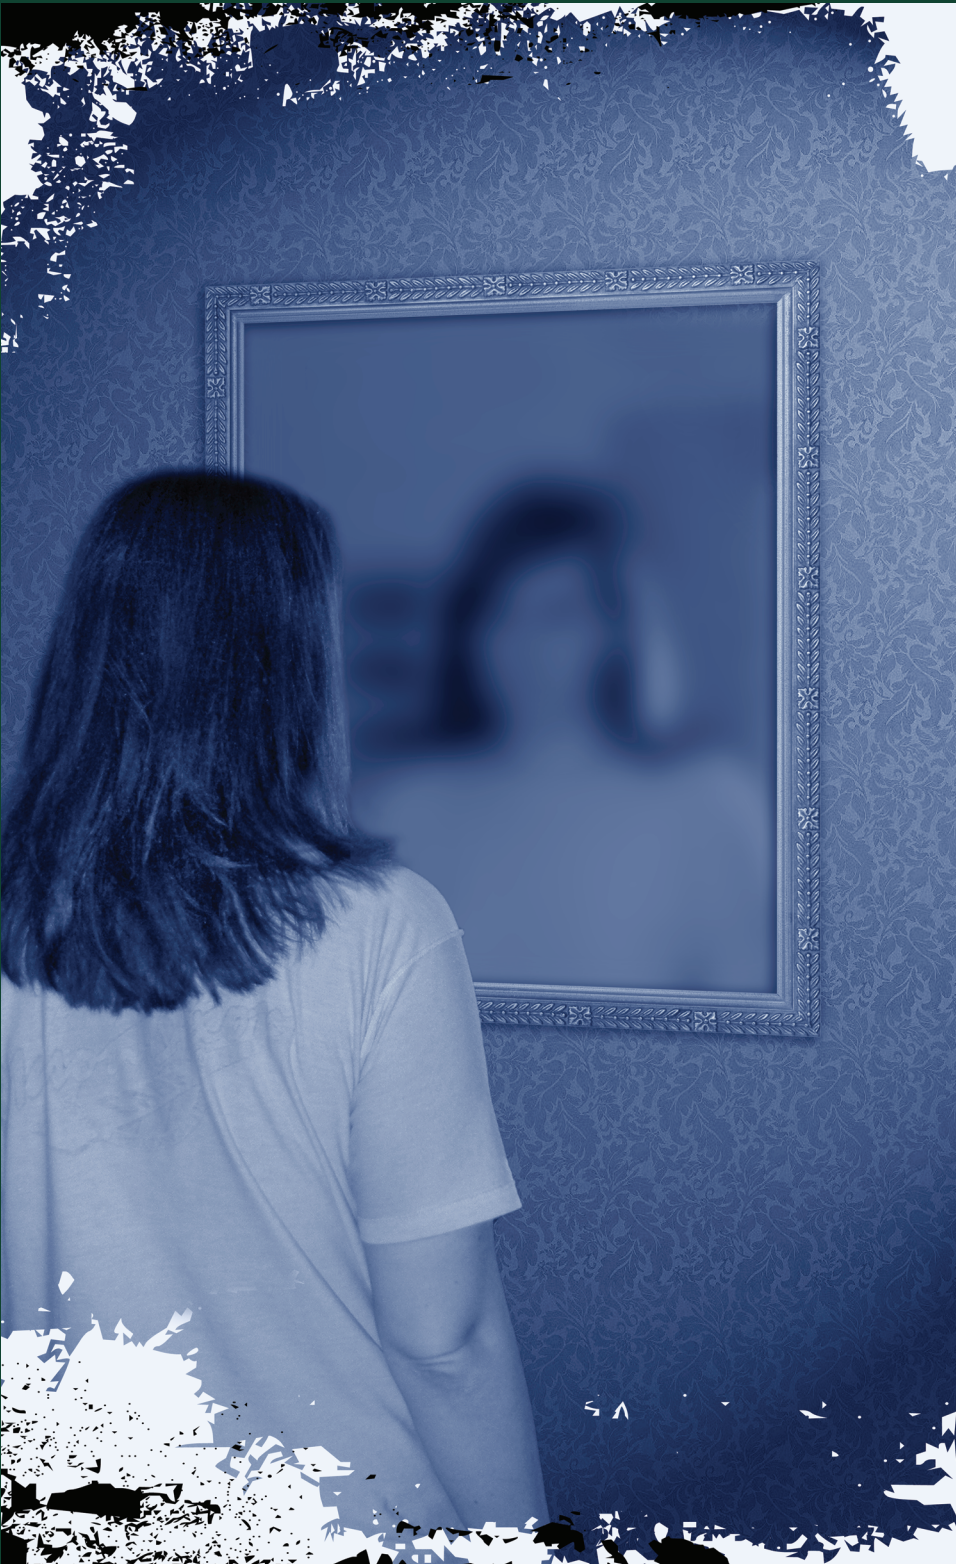

## The Future of Personality Disorders in DSM-V?

Andrew E. Skodol, M.D.  
and Donna S. Bender, Ph.D.

388

## ◀ Predictors of Spontaneous and Systematically Assessed Suicidal Adverse Events in the Treatment of SSRI-Resistant Depression in Adolescents (TORDIA) Study

David A. Brent, M.D., et al.

418

## Identification of a Schizophrenia-Associated Functional Noncoding Variant in *NOS1AP*

Naomi S. Wratten, Ph.D., et al.

434

## Altered Markers of Tonic Inhibition in the Dorsolateral Prefrontal Cortex of Subjects With Schizophrenia

Jaime G. Maldonado-Avilés, Ph.D., et al.

450

Continuing Medical Education 501

April 2009

Volume 166 • Number 4

Official Journal of the  
AMERICAN PSYCHIATRIC ASSOCIATION

[ajp.psychiatryonline.org](http://ajp.psychiatryonline.org)
